# Supplementary material for: Enhancing cardiac postoperative care: a smartwatch-integrated remote telemonitoring platform for health screening with ECG analysis
Source: PubMed Central journal article supplement (PMC11460294; doi:10.3389/fcvm.2024.1443998), 2024-09-23
Supplement: Datasheet1.pdf [file Datasheet1.pdf]

## SUPPLEMENTARY MATERIAL

### Enhancing Cardiac Postoperative Care: A Smartwatch-Integrated Remote Telemonitoring Platform for Health Screening with ECG Analysis

#### 1. Evaluation of the Impact of Telemonitoring with Smartwatches on Patient Perception

Supplementary Table 1. Technology Perception Questionnaire

| Questionnaire                                                                        | CTL<br>n=53 | TLM<br>n=55 | Total<br>n=108 |
|--------------------------------------------------------------------------------------|-------------|-------------|----------------|
| <b>Among the scenarios below, which one do you identify with the most:</b>           |             |             |                |
| I don't use technology                                                               | (1) 1.9%    | (3) 5.6%    | (4) 3.7%       |
| Television and radio                                                                 | (20) 37.7%  | (7) 12.7%   | (27) 25%       |
| Computer and cellphone                                                               | (27) 50.9%  | (33) 60%    | (60) 55.6%     |
| I use multiple devices                                                               | (5) 9.4%    | (12) 21.8%  | (17) 15.7%     |
| <b>Assessing the perception of self-care after the study, how would you rate it?</b> |             |             |                |
| It helped me learn more                                                              | (14) 26.4%  | (7) 12.7%   | (21) 19.4%     |
| It gave me greater control                                                           | (17) 32.1%  | (36) 65.5%  | (53) 49.1%     |
| It made my life easier                                                               | (13) 24.5%  | (0) 0%      | (13) 12%       |
| All of the options                                                                   | (1) 1.9%    | (6) 10.9%   | (7) 6.5%       |
| Other option                                                                         | (8) 15.1%   | (5) 9.1%    | (13) 12%       |
| <b>Benefits of the FAPO study</b>                                                    |             |             |                |
| Faster decision-making                                                               | (5) 9.4%    | (2) 3.6%    | (7) 6.5%       |
| Better informed                                                                      | (39) 73.6%  | (19) 34.5%  | (58) 53.7%     |
| Improved interaction with healthcare professionals                                   | (4) 7.5%    | (22) 40%    | (26) 24.1%     |
| None                                                                                 | (4) 7.5%    | (1) 1.8%    | (5) 4.6%       |
| All options                                                                          | (1) 3.7%    | (11) 20%    | (12) 11.1%     |
| <b>How useful were the features of the FAPO-X watch and app?</b>                     |             |             |                |
| Did not use                                                                          | (53) 100%   | (1) 1.9%    | (54) 50%       |
| Not very useful                                                                      | N/A         | (0) 0.0%    | (0) 0%         |
| Useful                                                                               | N/A         | (15) 27.3%  | (15) 15.9%     |
| Very useful                                                                          | N/A         | (39) 70.9%  | (39) 36.1%     |
| <b>How useful were the messages sent by the ChatBot?</b>                             |             |             |                |
| Did not use                                                                          | (53) 100%   | (2) 3.6%    | (55) 50.9%     |
| Not useful at all                                                                    | N/A         | (1) 1.8%    | (1) 0.9%       |
| Not very useful                                                                      | N/A         | (1) 1.8%    | (1) 0.9%       |
| Useful                                                                               | N/A         | (19) 34.5%  | (19) 17.6%     |
| Very useful                                                                          | N/A         | (32) 58.2%  | (32) 26.6%     |
| <b>Providing Health Readings</b>                                                     |             |             |                |
| Did not use                                                                          | (53) 100%   | (1) 1.8%    | (54) 50%       |
| Not very useful                                                                      | N/A         | (2) 3.6%    | (2) 1.9%       |
| Useful                                                                               | N/A         | (16) 29.1%  | (16) 14.8%     |
| Very useful                                                                          | N/A         | (35) 63.6%  | (35) 32.4%     |
| I don't know                                                                         | N/A         | (1) 1.8%    | (1) 0.9%       |
| <b>Exercise guidance</b>                                                             |             |             |                |
| Did not use                                                                          | (53) 100%   | (2) 3.8%    | (36) 34.3%     |
| Not useful at all                                                                    | N/A         | (4) 7.7%    | (22) 21.0%     |
| Not very useful                                                                      | N/A         | (5) 9.6%    | (5) 4.8%       |
| Useful                                                                               | N/A         | (19) 36.5%  | 20(19.0%)      |
| Very useful                                                                          | N/A         | (22) 42.3%  | 22(21.0%)      |

|                                                                                           |            |            |             |
|-------------------------------------------------------------------------------------------|------------|------------|-------------|
| I don't know                                                                              | N/A        | (0) 0%     | (0) 0%      |
| <b>Taking medications</b>                                                                 |            |            |             |
| Did not use                                                                               | (53) 100%  | (33) 60%   | (86) 79.6%  |
| Not useful at all                                                                         | N/A        | (9) 16.4%  | (9) 8.3%    |
| Not very useful                                                                           | N/A        | (2) 3.6%   | (2) 1.9%    |
| Useful                                                                                    | N/A        | (7) 12.7%  | (7) 6.5%    |
| Very useful                                                                               | N/A        | (3) 5.5%   | (3) 2.8%    |
| I don't know                                                                              | N/A        | (1) 1.8%   | (1) 0.9%    |
| <b>Engaging in physical exercises</b>                                                     |            |            |             |
| Did not use                                                                               | (53) 100%  | (2) 3.6%   | (35) 33.3 % |
| Not useful at all                                                                         | N/A        | (5) 9.1%   | (48) 45.7 % |
| Slightly useful                                                                           | N/A        | (5) 9.1%   | (6) 5.7 %   |
| Useful                                                                                    | N/A        | (19) 34.5% | (10) 9.5 %  |
| Very useful                                                                               | N/A        | (22) 40%   | (6) 5.7 %   |
| I don't know                                                                              | N/A        | (1) 1.8%   | (1) 0.9     |
| <b>How do you assess the importance of these smart watches for screening health data?</b> |            |            |             |
| I don't know                                                                              | (11) 20.8% | (0) 0%     | (11) 20.4 % |
| Important                                                                                 | (20) 37.7% | (0) 0%     | (21) 38.9 % |
| Very important                                                                            | (20) 37.7% | (55) 100%  | (22) 40.7 % |
| It doesn't matter                                                                         | (2) 3.8%   | (0) 0%     | (2) 1.9%    |

**Table S1.** All values of the characteristics are expressed in number of patients (n) and percentage (%).  
N/A: not applicable

## 2. Emergency Department Visits by Group

| <b>Contingency Table</b>            |                  |            |              |              |           |
|-------------------------------------|------------------|------------|--------------|--------------|-----------|
| <b>Group</b>                        | <b>ED Visits</b> |            | <b>Total</b> |              |           |
|                                     | <b>No</b>        | <b>Yes</b> |              | <b>Value</b> | <b>df</b> |
| CTL                                 | 35               | 12         | 47           |              |           |
| TLM                                 | 36               | 12         | 48           |              |           |
| Total                               | 71               | 24         | 95           |              |           |
| Chi-square tests ( $\chi^2$ )       |                  |            |              |              |           |
|                                     |                  |            | 1.78e-31     | 1            | 1.000     |
| $\chi^2$ with Continuity Correction |                  |            |              |              |           |
| N                                   |                  |            | 95           |              |           |

**Supplementary Table 2. Emergency Department Visits by Group:** Contingency table showing emergency department (ED) visits (No and Yes) for CTL (Control) and TLM (Telemonitored) groups, with  $\chi^2$  test results. (df): Degrees of freedom associated with the chi-square test. ( $\chi^2$  with Continuity Correction): Chi-square value adjusted for continuity correction to account for small sample sizes.

## 3. Bland Altman with Missing Data - Untreated Data

**Supplementary Table 3. Bland-Altman Analysis Results from Telemonitored Group: Smartwatch vs. Gold Standard**

| <b>Bland Altman – phase 4</b>       |                                      |                                      |                                   |                                              |
|-------------------------------------|--------------------------------------|--------------------------------------|-----------------------------------|----------------------------------------------|
|                                     | <b>S-BP</b><br><b>(mmHg)</b><br>n=49 | <b>D-BP</b><br><b>(mmHg)</b><br>n=49 | <b>HR</b><br><b>(bpm)</b><br>n=49 | <b>SPO<sub>2</sub></b><br><b>(%)</b><br>n=33 |
| Gold Standard<br>(mean±SD)          | 116±13.8                             | 76.6±9.31                            | 89.8±12.2                         | 93.7±3.03                                    |
| Smartwatch<br>(mean±SD)             | 116±13.7                             | 75.3±9.55                            | 90.6±12.5                         | 91.2±3.58                                    |
| Difference<br>(mean±SD)             | -0.03±3.03                           | -0.45±2.62                           | 0.775±2.80                        | -2.51±4.68                                   |
| Mean<br>(Between Devices)           | 116                                  | 76.8                                 | 90.2                              | 92.5                                         |
| Lower limit of agreement            | -5.9086                              | -4.678                               | -6.260                            | -7.08                                        |
| Upper limit of agreement            | 5.9875                               | 5.595                                | 4.710                             | 12.10                                        |
| Single Sample T-test**<br>(p value) | 0.9                                  | 0.2                                  | 0.06                              | <b>0.006</b>                                 |
| <b>Bland Altman – Phase 6</b>       |                                      |                                      |                                   |                                              |
|                                     | <b>S-BP</b><br>n=51                  | <b>D-BP</b><br>n=51                  | <b>HR</b><br>n=51                 | <b>SPO<sub>2</sub></b><br>n=39               |
| Gold Standard<br>(mean±SD)          | 118±13.7                             | 80.3±9.30                            | 83.1±16.3                         | 96.4±2.20                                    |
| Smartwatch<br>(mean±SD)             | 118±14.2                             | 79.9±11.6                            | 82.3±15.1                         | 93.9±4.23                                    |
| Difference<br>(mean±SD)             | -0.279±8.03                          | -0.389±6.87                          | -0.732±6.87                       | -2.54±4.36                                   |
| Mean<br>(Between Devices)           | 118                                  | 80.1                                 | 82.7                              | 95.2                                         |
| Lower limit of agreement            | -15.467                              | -13.088                              | -12.595                           | -6.40                                        |
| Upper limit of agreement            | 16.025                               | 13.866                               | 14.059                            | 11.48                                        |
| Single Sample T-test**<br>(p value) | 0.8                                  | 0.7                                  | <b>0.4</b>                        | <b>0.001</b>                                 |

**Table S3.** S-BP refers to Systolic Blood Pressure, D-BP refers to Diastolic Blood Pressure, HR refers to Heart Rate, and SpO2 refers to Blood Oxygen Saturation (n= 55. per variable). SD represents Standard

Deviation. The values are presented in the format of Mean  $\pm$  SD.

### Supplementary Figure 1. Bland-Altman Analysis: Pre-Telemonitoring Phase - Smartwatch vs. Gold Standard

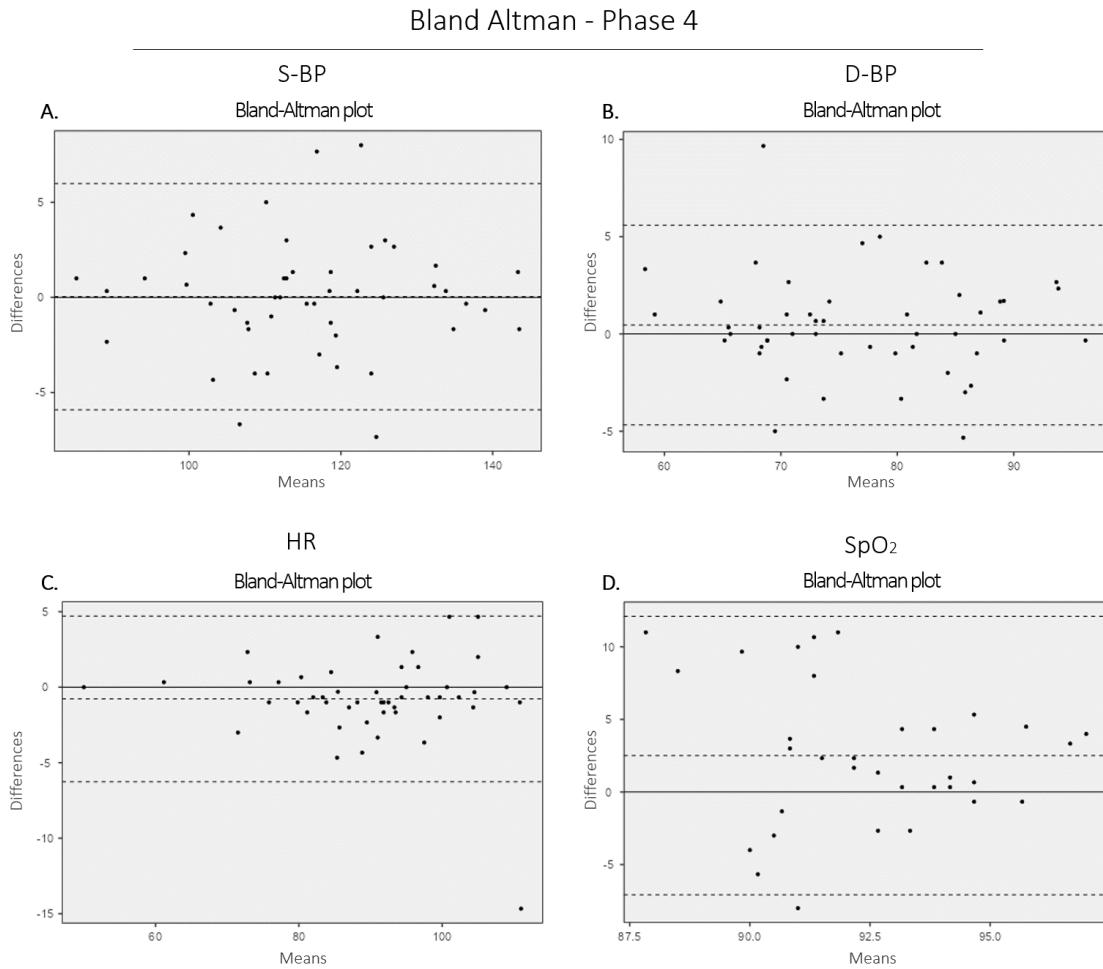

**Figure S1.** Bland-Altman Analysis Results for the Telemonitored Group (pre-telemonitoring phase): Smartwatch vs. Gold Standard Comparison. The plot showcases the agreement between measurements obtained from the smartwatch and the gold standard for various vital signs: (A) Systolic Blood Pressure, (B) Diastolic Blood Pressure, (C) Heart Rate, and (D) Oxygen Saturation.

### Supplementary Figure 2. Bland-Altman Analysis: Post-Telemonitoring Phase - Smartwatch vs. Gold Standard

## Bland Altman – Phase 6

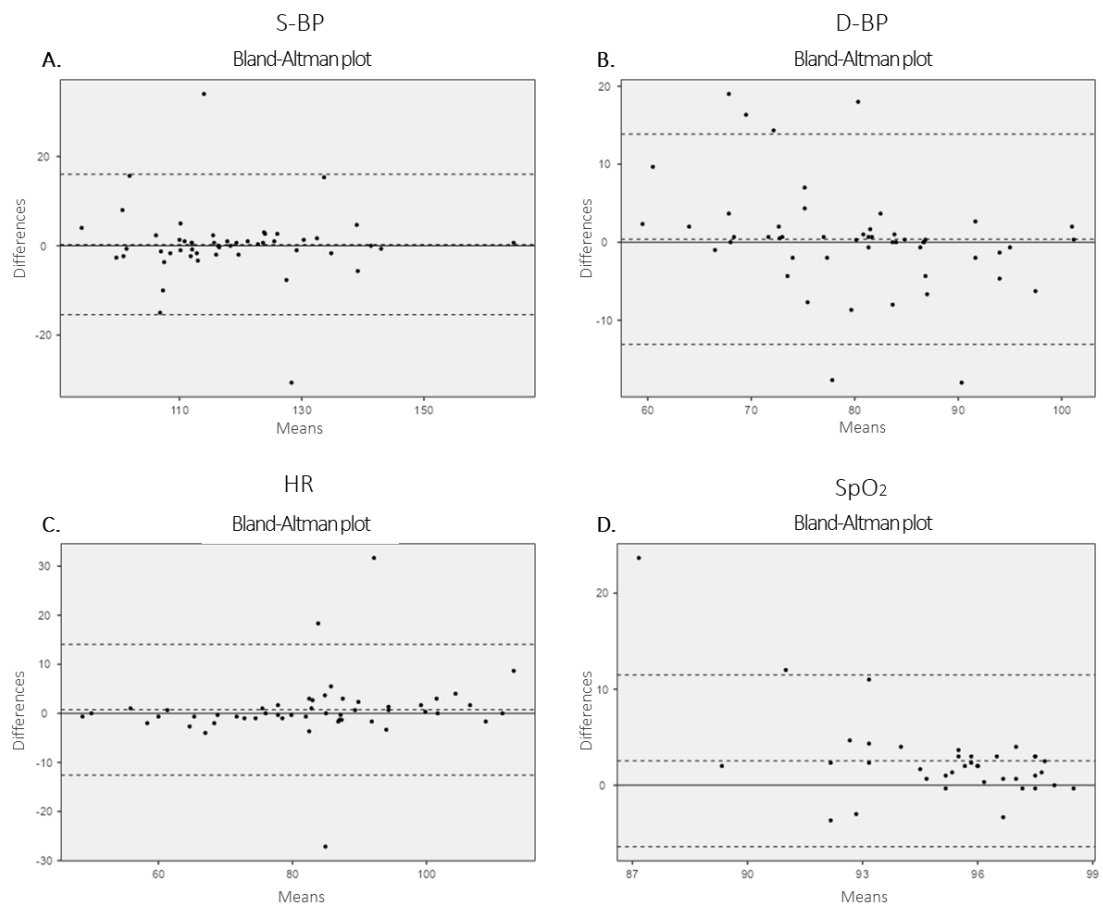

**Figure S2.** Bland-Altman Analysis Results for the Telemonitored Group (post-telemonitoring phase): Smartwatch vs. Gold Standard Comparison. The plot showcases the agreement between measurements obtained from the smartwatch and the gold standard for various vital signs: (A) Systolic Blood Pressure, (B) Diastolic Blood Pressure, (C) Heart Rate, and (D) Oxygen Saturation.

#### 4. TOST test with Missing data - Untreated Data

**Supplementary Table 4. TOST Results for Telemonitored in the Phase 4 - Vital Signs during Telemonitored Pre-Measurement Phase**

| TOST Results phase 4   |            | t        | df  | p            |
|------------------------|------------|----------|-----|--------------|
| <b>S-BP</b>            | t-test     | -0.00662 | 106 | 0.995        |
|                        | TOST Upper | 1.78     | 106 | <b>0.039</b> |
|                        | TOST Lower | -1.79    | 106 | <b>0.038</b> |
| <b>D-BP</b>            | t-test     | -0.226   | 106 | 0.822        |
|                        | TOST Upper | 2.5      | 106 | <b>0.007</b> |
|                        | TOST Lower | -2.95    | 106 | <b>0.002</b> |
| <b>HR</b>              | t-test     | 0.358    | 106 | 0.721        |
|                        | TOST Upper | 2.96     | 106 | <b>0.002</b> |
|                        | TOST Lower | -2.24    | 106 | <b>0.014</b> |
| <b>SpO<sub>2</sub></b> | t-test     | -3.37    | 70  | <b>0.001</b> |

**Table S4. TOST Analysis for Pre-Measurement Phase:** \*Interpretation of TOST Upper and Lower only

**Supplementary Figure 3. TOST Analysis for Pre-Measurement Phase**

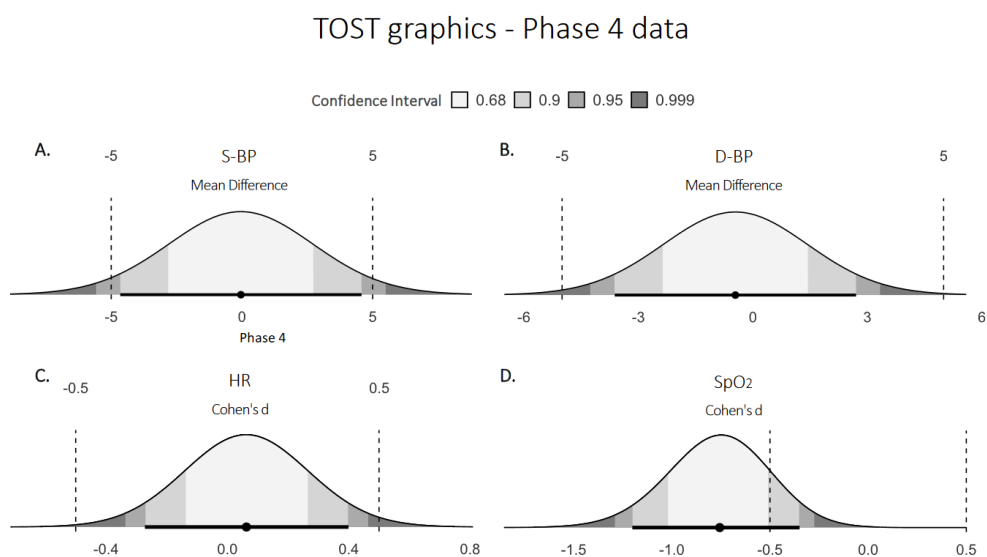

**Figure S3. TOST Analysis for Pre-Measurement Phase.** (A) Systolic Blood Pressure (S-BP), (B) Heart Rate (HR), (C) Diastolic Blood Pressure (D-BP) and (D) Oxygen Saturation (SpO<sub>2</sub>). Each subplot showcases the statistical analysis and equivalence testing for the respective vital sign.

### Supplementary Table 5. TOST Results for Telemonitored Post-Measurement Phase

| TOST Results Phase 6   |            | t       | df  | p            |
|------------------------|------------|---------|-----|--------------|
| <b>S-BP</b>            | t-test     | -0.13   | 102 | 0.897        |
|                        | TOST Upper | 1.69    | 102 | <b>0.047</b> |
|                        | TOST Lower | -1.95   | 102 | <b>0.027</b> |
| <b>D-BP</b>            | t-test     | -0.0984 | 102 | 0.922        |
|                        | TOST Upper | 2.41    | 102 | <b>0.009</b> |
|                        | TOST Lower | -2.61   | 102 | <b>0.005</b> |
| <b>HR</b>              | t-test     | -0.203  | 102 | 0.839        |
|                        | TOST Upper | 2.35    | 102 | <b>0.01</b>  |
|                        | TOST Lower | -2.75   | 102 | <b>0.003</b> |
| <b>SpO<sub>2</sub></b> | t-test     | -3.23   | 80  | <b>0.002</b> |

**Table S5. TOST Analysis for Post-Measurement Phase:** \*Interpretation of TOST Upper and Lower only

### Supplementary Figure 4. TOST Analysis for Post-Measurement Phase

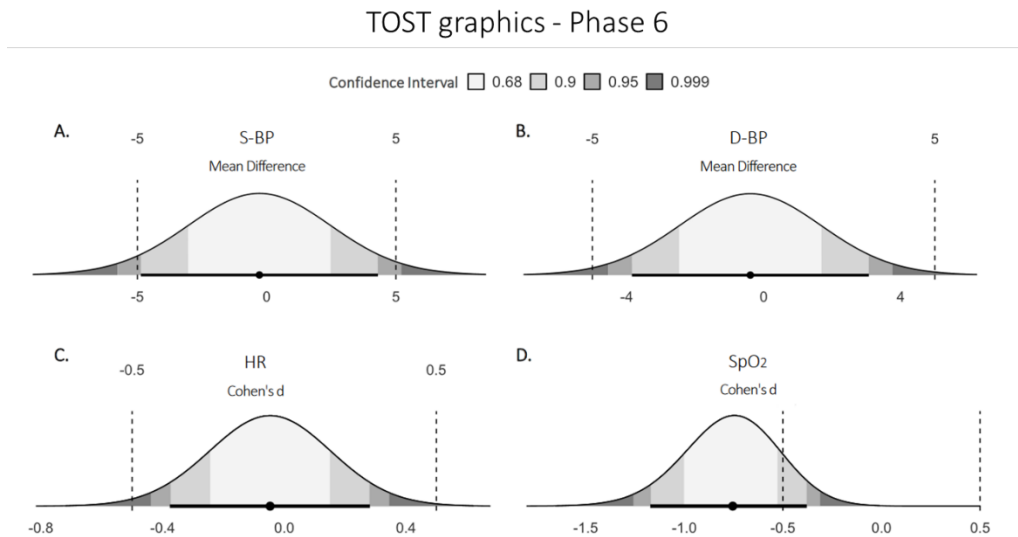

**Figure S4. TOST Analysis for Post-Measurement Phase.** (A) Systolic Blood Pressure (S-BP), (B) Heart Rate (HR), (C) Diastolic Blood Pressure (D-BP) and, (D) Oxygen Saturation (SpO<sub>2</sub>). Each subplot showcases the statistical analysis and equivalence testing for the respective vital sign.
